# Supplementary material
Source: Elsevier journal article supplement (https://www.sciencedirect.com/science/article/pii/S0300893218302252)
Supplement: mmc1 [file mmc1.pdf]

## SUPPLEMENTARY MATERIAL

### **Other investigators of the ICA-SEMES (Research group on Acute Heart Failure of the Spanish Society of Emergency Medicine):**

Marta Fuentes Gil (Hospital Universitario de Salamanca); Eva Salvo (Hospital La Fe de Valencia); Rosa Escoda, Sira Aguiló, Carolina Xipell, Carolina Sánchez, Josep M. Gaytan (Hospital Clínic de Barcelona); Antonio Noval (Hospital Insular de Las Palmas de Gran Canaria); José M. Torres (Hospital Reina Sofía de Córdoba); Amparo Valero, María Angeles Juan Gómez (Hospital Dr. Peset de Valencia); Alfons Aguirre, Maria Àngels Pedragosa (Hospital del Mar de Barcelona); Raquel Torres-Gárate (Hospital Severo Ochoa de Leganés, Madrid); María Isabel Alonso, Francisco Ruiz (Hospital de Valme de Sevilla); José Miguel Franco (Hospital Miguel Servet de Zaragoza); Susana Sánchez (Hospital Rio Ortega de Valladolid); Aitor Alquézar, Miguel Alberto Rizzi, Sergio Herrera (Hospital San Pau de Barcelona); Irene Cabello, Álex Roset (Hospital Universitari de Bellvitge, Barcelona); Héctor Alonso, Pablo Garmila (Hospital Marqués de Valdecilla de Santander); Esther Rodríguez Adrada, Guillermo Llopis García (Hospital Clínico San Carlos, Madrid); José María Álvarez Pérez (Hospital Universitario de Burgos); Ana Belén Mecina (Hospital Universitario Fundación Alcorcón, Madrid); Joaquín Vázquez Álvarez, Marta Sánchez González, Belén Prieto, María García García, José Juan Gil Román (Hospital Universitario Central de Asturias); Víctor Marquina, Inmaculada Jiménez, Patricia Javaloyes, Néstor Hernández, Benjamin Brouzet, Ana López (Hospital General de Alicante); Juan Antonio Andueza (Hospital General Universitario Gregorio Marañón de Madrid), Rodolfo Romero (Hospital Getafe de Madrid); Roberto Calvache (Hospital de Henares de Madrid), María Teresa Lorca, Luis Calderón (Hospital del Tajo de Madrid); Beatriz Amores Arriaga, Beatriz Sierra (Hospital Clínico Lozano Blesa de Zaragoza); Pascual Piñera, José Andrés Sánchez Nicolás (Hospital General Universitario Reina Sofía de Murcia); Enrique Martín Mojarro (Hospital Sant Pau i Santa Tecla de Tarragona); Lisette Travería Bécquer (Hospital Universitario de Canarias de Tenerife); Lluís Llauger García, Gerard Corominas La Salle (Hospital Universitari de Vic de Barcelona); Carmen Agüera Urbano (Hospital Costa del Sol de Marbella, Málaga);

Ester Soy Ferrer (Hospital Josep Trueta de Girona); Elena Díaz (Hospital de San Juan de Alicante); Josep Tost (Consorti Sanitari de Terrassa); José Pavón (Hospital Dr. Negrín de Las Palmas de Gran Canaria).
